# Supplementary material
Source: Springer Nature journal article supplement (https://www.springermedizin.de/resource/supplementary/12911_2013_730_MOESM3_ESM.pdf/9526230)
Supplement: MOESM3 [file 9526230]

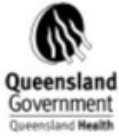

**Metro South Health Service District**  
**Indigenous Health Check: Age 15-54**  
 Community Health

|             |        |
|-------------|--------|
| UR Number   |        |
| Surname     |        |
| Other Names |        |
| DOB         |        |
| Sex         | Female |

An \* indicates a mandatory field.

**A. PATIENT DETAILS**

|                                                       |                                                                                                                                                                                                              |       |  |
|-------------------------------------------------------|--------------------------------------------------------------------------------------------------------------------------------------------------------------------------------------------------------------|-------|--|
| Date:                                                 |                                                                                                                                                                                                              |       |  |
| Age:                                                  |                                                                                                                                                                                                              |       |  |
| Consent for health assessment? *                      | <input type="radio"/> Yes <input type="radio"/> No                                                                                                                                                           | Date: |  |
| Consent for health assessment to be used in research? | <input type="radio"/> Yes <input type="radio"/> No <input checked="" type="radio"/> Missing                                                                                                                  |       |  |
| Previous Health Assessment?                           | <input type="radio"/> Yes <input type="radio"/> No <input checked="" type="radio"/> Missing                                                                                                                  | Date: |  |
| Ethnicity: *                                          | <input type="radio"/> Aboriginal <input type="radio"/> Aboriginal & Torres Strait Islander <input type="radio"/> Torres Strait Islander <input type="radio"/> Other <input checked="" type="radio"/> Missing |       |  |
| Mother's URN:*                                        | Father's URN: *<br><input type="radio"/> Not in ERIC <input type="radio"/> Not in ERIC                                                                                                                       |       |  |

**CLINICAL FINDINGS**

|                                              |                                                                                                                                                                                |
|----------------------------------------------|--------------------------------------------------------------------------------------------------------------------------------------------------------------------------------|
| Allergy                                      | <input type="radio"/> Yes <input type="radio"/> No <input checked="" type="radio"/> Missing                                                                                    |
| Which drug/general?                          |                                                                                                                                                                                |
| <b>Metabolic and Cardiovascular Measures</b> |                                                                                                                                                                                |
| Blood Pressure:                              | / mmHg (Systolic/Diastolic)                                                                                                                                                    |
| Pulse:                                       | /min                                                                                                                                                                           |
| Weight:                                      | kg                                                                                                                                                                             |
| Height:                                      | cm                                                                                                                                                                             |
| BMI:                                         |                                                                                                                                                                                |
| Waist Measurement:                           | cm                                                                                                                                                                             |
| Blood Glucose Level:                         | mmol/L                                                                                                                                                                         |
| HbA1c                                        | %                                                                                                                                                                              |
| <b>Urinalysis</b>                            |                                                                                                                                                                                |
| Glucose:                                     | <input type="radio"/> Negative <input type="radio"/> Trace <input type="radio"/> + <input type="radio"/> ++ <input type="radio"/> +++ <input checked="" type="radio"/> Missing |
| Bilirubin:                                   |                                                                                                                                                                                |

|                                      |                                                                                                                                                                                |                           |
|--------------------------------------|--------------------------------------------------------------------------------------------------------------------------------------------------------------------------------|---------------------------|
|                                      | <input type="radio"/> Negative <input type="radio"/> Trace <input type="radio"/> + <input type="radio"/> ++ <input type="radio"/> +++ <input checked="" type="radio"/> Missing |                           |
| Ketones:                             | <input type="radio"/> Negative <input type="radio"/> Trace <input type="radio"/> + <input type="radio"/> ++ <input type="radio"/> +++ <input checked="" type="radio"/> Missing |                           |
| Blood:                               | <input type="radio"/> Negative <input type="radio"/> Trace <input type="radio"/> + <input type="radio"/> ++ <input type="radio"/> +++ <input checked="" type="radio"/> Missing |                           |
| Protein:                             | <input type="radio"/> Negative <input type="radio"/> Trace <input type="radio"/> + <input type="radio"/> ++ <input type="radio"/> +++ <input checked="" type="radio"/> Missing |                           |
| Nitrites:                            | <input type="radio"/> Negative <input type="radio"/> Positive <input checked="" type="radio"/> Missing                                                                         |                           |
| Leucocytes:                          | <input type="radio"/> Negative <input type="radio"/> Trace <input type="radio"/> + <input type="radio"/> ++ <input type="radio"/> +++ <input checked="" type="radio"/> Missing |                           |
| If abnormal proceed to ACR - result: | Albuminuria:                                                                                                                                                                   | <input type="text"/> mg/L |
|                                      | Creatinine:                                                                                                                                                                    | <input type="text"/>      |
|                                      | AC Ratio:                                                                                                                                                                      | <input type="text"/>      |

### Immunisation History

|                            |                                                                                             |                                                            |
|----------------------------|---------------------------------------------------------------------------------------------|------------------------------------------------------------|
| Immunisation up to date?   | <input type="radio"/> Yes <input type="radio"/> No <input checked="" type="radio"/> Missing |                                                            |
| Gardasil course completed? | <input type="radio"/> Yes <input type="radio"/> No <input checked="" type="radio"/> Missing | <input type="radio"/> Given <input type="radio"/> Declined |
| Fluvax due?                | <input type="radio"/> Yes <input type="radio"/> No <input checked="" type="radio"/> Missing | <input type="radio"/> Given <input type="radio"/> Declined |
| Pneumovax due?             | <input type="radio"/> Yes <input type="radio"/> No <input checked="" type="radio"/> Missing | <input type="radio"/> Given <input type="radio"/> Declined |
| ADT due?                   | <input type="radio"/> Yes <input type="radio"/> No <input checked="" type="radio"/> Missing | <input type="radio"/> Given <input type="radio"/> Declined |
| Other due?                 | <input type="radio"/> Yes <input type="radio"/> No <input checked="" type="radio"/> Missing |                                                            |
| Please specify:            | <input type="text"/>                                                                        |                                                            |

### Visual Acuity

|                                                    |                                                                                                                                                                             |                         |                         |
|----------------------------------------------------|-----------------------------------------------------------------------------------------------------------------------------------------------------------------------------|-------------------------|-------------------------|
| Best Vision (Use Glasses if available or pinhole): | <input type="radio"/> With glasses <input type="radio"/> Without glasses <input type="radio"/> Glasses normally worn but not today <input checked="" type="radio"/> Missing |                         |                         |
|                                                    | <b>Left Eye</b>                                                                                                                                                             | <b>Right Eye</b>        | <b>Both Eyes</b>        |
|                                                    | 6/ <input type="text"/>                                                                                                                                                     | 6/ <input type="text"/> | 6/ <input type="text"/> |
| Identified Problem:                                | <input type="text"/>                                                                                                                                                        |                         |                         |

## HEALTH AND LIFESTYLE

|                             |                                                                                                                                              |
|-----------------------------|----------------------------------------------------------------------------------------------------------------------------------------------|
| <b>Smoking</b>              |                                                                                                                                              |
| Never Smoked:               | <input type="radio"/> Yes <input type="radio"/> No <input checked="" type="radio"/> Missing                                                  |
| Ex-smoker:                  | <input type="radio"/> Yes <input type="radio"/> No <input checked="" type="radio"/> Missing         Year that you quit: <input type="text"/> |
| Smoker:                     | <input type="radio"/> Yes <input type="radio"/> No <input checked="" type="radio"/> Missing                                                  |
| Wishes to quit:             | <input type="radio"/> Yes <input type="radio"/> No <input checked="" type="radio"/> Missing                                                  |
| Age started:                | <input type="text"/>                                                                                                                         |
| Tobacco:                    | <input type="radio"/> Yes <input type="radio"/> No <input checked="" type="radio"/> Missing                                                  |
| Number of cigarettes / day: | <input type="text"/>                                                                                                                         |

|                                                                                 |                                                                                                                                                                                                                                                                                              |
|---------------------------------------------------------------------------------|----------------------------------------------------------------------------------------------------------------------------------------------------------------------------------------------------------------------------------------------------------------------------------------------|
| Pack Years:                                                                     | <input type="text"/>                                                                                                                                                                                                                                                                         |
| To complete a Fagerstrom Test, click the following                              | <a href="#">Fagerstrom Test</a>                                                                                                                                                                                                                                                              |
| Fagerstrom Score:                                                               | <input type="text"/>                                                                                                                                                                                                                                                                         |
| Comment:                                                                        | <input type="text"/>                                                                                                                                                                                                                                                                         |
| <b>Alcohol</b>                                                                  |                                                                                                                                                                                                                                                                                              |
| Alcohol:                                                                        | <input type="radio"/> Yes <input type="radio"/> No <input checked="" type="radio"/> Missing                                                                                                                                                                                                  |
| If yes, please state if harmful or non-harmful levels                           | <input type="checkbox"/> > 2 std drinks/day avg; drinks 6-7 days/wk; > 14 std drinks/wk<br><input type="checkbox"/> ≤ 2 std drinks/day, 1-2 alcohol free days/wk; <14 std drinks/wk<br><input type="checkbox"/> > 4 std drinks on any one day<br><input checked="" type="checkbox"/> Missing |
| To complete an Alcohol Screen (Audit), click the following                      | <a href="#">Alcohol Screen (Audit)</a>                                                                                                                                                                                                                                                       |
| Total audit score:                                                              | <input type="text"/>                                                                                                                                                                                                                                                                         |
| Caffeine (coffee, tea, green tea, Red Bull, V drinks, Coke, Pepsi, iced coffee) | <input type="radio"/> Yes <input type="radio"/> No <input checked="" type="radio"/> Missing                                                                                                                                                                                                  |
| Drinks per day:                                                                 | <input type="text"/>                                                                                                                                                                                                                                                                         |
| <b>Other Substances</b>                                                         |                                                                                                                                                                                                                                                                                              |
| Other Substances                                                                | <input type="radio"/> Yes <input type="radio"/> No <input checked="" type="radio"/> Missing                                                                                                                                                                                                  |
| Opiates (heroine, methadone, codeine, endone, MS contin)                        | <input type="radio"/> Yes <input type="radio"/> No <input checked="" type="radio"/> Missing                                                                                                                                                                                                  |
| Cannabis/Yarndi                                                                 | <input type="radio"/> Yes <input type="radio"/> No <input checked="" type="radio"/> Missing                                                                                                                                                                                                  |
| Amphetamines (speed, base, crystal meth, ice, ecstasy, MDMA)                    | <input type="radio"/> Yes <input type="radio"/> No <input checked="" type="radio"/> Missing                                                                                                                                                                                                  |
| Cocaine                                                                         | <input type="radio"/> Yes <input type="radio"/> No <input checked="" type="radio"/> Missing                                                                                                                                                                                                  |
| Hallucinogen (LSD, magic mushrooms)                                             | <input type="radio"/> Yes <input type="radio"/> No <input checked="" type="radio"/> Missing                                                                                                                                                                                                  |
| Volatile Substances (paints, glues)                                             | <input type="radio"/> Yes <input type="radio"/> No <input checked="" type="radio"/> Missing                                                                                                                                                                                                  |
| Prescription medicine (valium, temazepam)                                       | <input type="radio"/> Yes <input type="radio"/> No <input checked="" type="radio"/> Missing                                                                                                                                                                                                  |
| Over the counter medicine                                                       | <input type="text"/>                                                                                                                                                                                                                                                                         |

|                                                                                                        |                                                                                                                                                                                                            |
|--------------------------------------------------------------------------------------------------------|------------------------------------------------------------------------------------------------------------------------------------------------------------------------------------------------------------|
| (pseudoephedrine)                                                                                      | <input type="radio"/> Yes <input type="radio"/> No <input checked="" type="radio"/> Missing                                                                                                                |
| Comments:                                                                                              |                                                                                                                                                                                                            |
| <b>Nutrition</b>                                                                                       |                                                                                                                                                                                                            |
| Are you concerned about your weight?                                                                   | <input type="radio"/> Yes <input type="radio"/> No <input checked="" type="radio"/> Missing                                                                                                                |
| Has your weight changed in the past 12 months (are your clothes tighter or looser):                    | <input type="radio"/> Yes <input type="radio"/> No <input checked="" type="radio"/> Missing <input type="radio"/> Tighter<br><input type="radio"/> Looser<br><input checked="" type="radio"/> Missing      |
| Has there been any change in your appetite lately?                                                     | <input type="radio"/> I am not hungry/do not feel like eating<br><input type="radio"/> No change<br><input type="radio"/> I am always hungry/eating more often<br><input checked="" type="radio"/> Missing |
| Bowel habits/changes including constipation:                                                           | <input type="radio"/> Yes <input type="radio"/> No <input checked="" type="radio"/> Missing                                                                                                                |
| If Yes, specify:                                                                                       |                                                                                                                                                                                                            |
| Fruit/Vegetable intake in the last 24 hours:                                                           | <input type="radio"/> Adequate (2 serves of fruit and 5 vegetables)<br><input type="radio"/> Sub-optimal<br><input type="radio"/> None<br><input checked="" type="radio"/> Missing                         |
| Take-away (meals per week)                                                                             |                                                                                                                                                                                                            |
| Soft drink/cordial (glasses per day)                                                                   |                                                                                                                                                                                                            |
| Identified Nutrition problems:                                                                         |                                                                                                                                                                                                            |
| <b>Physical Activity</b>                                                                               |                                                                                                                                                                                                            |
| How often in a week are you physically active?                                                         |                                                                                                                                                                                                            |
| <i>A session is &gt; 30 mins exercise that raised their heart rate or caused them to huff and puff</i> |                                                                                                                                                                                                            |
| Do you play any regular sport?                                                                         | <input type="radio"/> Yes <input type="radio"/> No <input checked="" type="radio"/> Missing                                                                                                                |
| If Yes, please specify:                                                                                |                                                                                                                                                                                                            |
| Identified problems:                                                                                   |                                                                                                                                                                                                            |
| <b>Hearing</b>                                                                                         |                                                                                                                                                                                                            |
| Hearing loss:                                                                                          | <input type="radio"/> Yes <input type="radio"/> No <input checked="" type="radio"/> Missing                                                                                                                |
| Whisper test done:                                                                                     | <input type="radio"/> Yes <input type="radio"/> No <input checked="" type="radio"/> Missing                                                                                                                |
| Result:                                                                                                | <input type="radio"/> Heard <input type="radio"/> Not heard <input checked="" type="radio"/> Missing                                                                                                       |
| Identified problems:                                                                                   |                                                                                                                                                                                                            |

|                                                        |                                                                                                                          |                                                                                             |
|--------------------------------------------------------|--------------------------------------------------------------------------------------------------------------------------|---------------------------------------------------------------------------------------------|
| Actions:                                               |                                                                                                                          |                                                                                             |
| <b>Dental</b>                                          |                                                                                                                          |                                                                                             |
| Dental Problems:                                       | <input type="radio"/> Yes <input type="radio"/> No <input checked="" type="radio"/> Missing                              |                                                                                             |
| Dental Caries:                                         | <input type="radio"/> Yes <input type="radio"/> No <input checked="" type="radio"/> Missing                              |                                                                                             |
| Gum Disease:                                           | <input type="radio"/> Yes <input type="radio"/> No <input checked="" type="radio"/> Missing                              |                                                                                             |
| Identified Problems:                                   |                                                                                                                          |                                                                                             |
| <b>Mental Health</b>                                   |                                                                                                                          |                                                                                             |
| Mental Health Issue:                                   | <input type="radio"/> Yes <input type="radio"/> No <input checked="" type="radio"/> Missing                              |                                                                                             |
| Select applicable:                                     |                                                                                                                          |                                                                                             |
| Depression:                                            | <input type="radio"/> Yes <input type="radio"/> No <input checked="" type="radio"/> Missing <i>If yes, please do K10</i> |                                                                                             |
| Suicidal ideas:                                        | <input type="radio"/> Yes <input type="radio"/> No <input checked="" type="radio"/> Missing <i>If yes, please do K10</i> |                                                                                             |
| Anxiety:                                               | <input type="radio"/> Yes <input type="radio"/> No <input checked="" type="radio"/> Missing <i>If yes, please do K10</i> |                                                                                             |
| Psychosis:                                             | <input type="radio"/> Yes <input type="radio"/> No <input checked="" type="radio"/> Missing                              |                                                                                             |
| Bipolar:                                               | <input type="radio"/> Yes <input type="radio"/> No <input checked="" type="radio"/> Missing                              |                                                                                             |
| Illicit drugs:                                         | <input type="radio"/> Yes <input type="radio"/> No <input checked="" type="radio"/> Missing                              |                                                                                             |
| Family problems:                                       | <input type="radio"/> Yes <input type="radio"/> No <input checked="" type="radio"/> Missing                              |                                                                                             |
| Relationship problems:                                 | <input type="radio"/> Yes <input type="radio"/> No <input checked="" type="radio"/> Missing                              |                                                                                             |
| Grief:                                                 | <input type="radio"/> Yes <input type="radio"/> No <input checked="" type="radio"/> Missing                              |                                                                                             |
| Stress:                                                | <input type="radio"/> Yes <input type="radio"/> No <input checked="" type="radio"/> Missing                              |                                                                                             |
| Identified Problems:                                   |                                                                                                                          |                                                                                             |
| To complete an Outcome Tool (K10), click the following | <a href="#">Outcome Tool (K10)</a>                                                                                       |                                                                                             |
| Outcome Tool (K10) score:                              |                                                                                                                          |                                                                                             |
| <b>Skin</b>                                            |                                                                                                                          |                                                                                             |
| Skin:                                                  | Any skin problems                                                                                                        | <input type="radio"/> Yes <input type="radio"/> No <input checked="" type="radio"/> Missing |
|                                                        | Lesion to check                                                                                                          | <input type="radio"/> Yes <input type="radio"/> No <input checked="" type="radio"/> Missing |
|                                                        | Rash unspecified                                                                                                         | <input type="radio"/> Yes <input type="radio"/> No <input checked="" type="radio"/> Missing |
|                                                        | Scabies                                                                                                                  | <input type="radio"/> Yes <input type="radio"/> No <input checked="" type="radio"/> Missing |
|                                                        | Pus                                                                                                                      | <input type="radio"/> Yes <input type="radio"/> No <input checked="" type="radio"/> Missing |
|                                                        |                                                                                                                          |                                                                                             |

|                      |                  |                                                                                             |
|----------------------|------------------|---------------------------------------------------------------------------------------------|
|                      | Fungal           | <input type="radio"/> Yes <input type="radio"/> No <input checked="" type="radio"/> Missing |
|                      | Eczema/Allergies | <input type="radio"/> Yes <input type="radio"/> No <input checked="" type="radio"/> Missing |
|                      | Skin cancer      | <input type="radio"/> Yes <input type="radio"/> No <input checked="" type="radio"/> Missing |
|                      | Psoriasis        | <input type="radio"/> Yes <input type="radio"/> No <input checked="" type="radio"/> Missing |
|                      | Other            | <input type="radio"/> Yes <input type="radio"/> No <input checked="" type="radio"/> Missing |
| Identified Problems: |                  |                                                                                             |

### WOMEN'S HEALTH

|                         |                                                                                                                                                                                                                                                                                     |
|-------------------------|-------------------------------------------------------------------------------------------------------------------------------------------------------------------------------------------------------------------------------------------------------------------------------------|
| Urinary Problems:       | <input type="radio"/> Yes <input type="radio"/> No <input checked="" type="radio"/> Missing                                                                                                                                                                                         |
| Identified Problems:    |                                                                                                                                                                                                                                                                                     |
| Pap smear due:          | <input type="radio"/> Yes <input type="radio"/> No <input checked="" type="radio"/> Missing <input type="radio"/> Given<br><input type="radio"/> Declined                                                                                                                           |
| Last done:              |                                                                                                                                                                                                                                                                                     |
| Mammogram due:          | <input type="radio"/> Yes <input type="radio"/> No <input checked="" type="radio"/> Missing                                                                                                                                                                                         |
| Last done:              |                                                                                                                                                                                                                                                                                     |
| Contraception required: | <input type="radio"/> Yes <input type="radio"/> No <input checked="" type="radio"/> Missing                                                                                                                                                                                         |
|                         | <input type="radio"/> Condoms <input type="radio"/> OCP <input type="radio"/> Mini Pill <input type="radio"/> Depo <input type="radio"/> Implanon <input type="radio"/> Mirena <input type="radio"/> Other IUD <input type="radio"/> Other <input checked="" type="radio"/> Missing |
| Comment:                |                                                                                                                                                                                                                                                                                     |

### Sexual Health Check

|                                               |                                                                                             |
|-----------------------------------------------|---------------------------------------------------------------------------------------------|
| Any problems?                                 | <input type="radio"/> Yes <input type="radio"/> No <input checked="" type="radio"/> Missing |
| Symptoms or concerns?                         |                                                                                             |
| Chlamydia and Gonorrhea screening advised:    | <input type="radio"/> Yes <input type="radio"/> No <input checked="" type="radio"/> Missing |
| Hepatitis B, HIV, Syphilis screening advised: | <input type="radio"/> Yes <input type="radio"/> No <input checked="" type="radio"/> Missing |
| Have you had any unsafe sex in the last year? | <input type="radio"/> Yes <input type="radio"/> No <input checked="" type="radio"/> Missing |
| <b>Hepatitis C Risks</b>                      |                                                                                             |
| Exposure to Hepatitis C                       | <input type="radio"/> Yes <input type="radio"/> No <input checked="" type="radio"/> Missing |
|                                               |                                                                                             |

|                                                                                |                                                                                                                                                                                                          |                                                                                                  |
|--------------------------------------------------------------------------------|----------------------------------------------------------------------------------------------------------------------------------------------------------------------------------------------------------|--------------------------------------------------------------------------------------------------|
| Tattoos                                                                        | <input type="radio"/> Yes <input type="radio"/> No <input checked="" type="radio"/> Missing                                                                                                              |                                                                                                  |
| IVDU                                                                           | <input type="radio"/> Yes <input type="radio"/> No <input checked="" type="radio"/> Missing                                                                                                              |                                                                                                  |
| Incarceration history                                                          | <input type="radio"/> Yes <input type="radio"/> No <input checked="" type="radio"/> Missing                                                                                                              |                                                                                                  |
| Investigation and Advice undertaken                                            |                                                                                                                                                                                                          |                                                                                                  |
| <b>Client's Overall Health Status</b>                                          | <input type="radio"/> Very Good<br><input type="radio"/> Good<br><input type="radio"/> Fair<br><input type="radio"/> Poor<br><input type="radio"/> Very Poor<br><input checked="" type="radio"/> Missing |                                                                                                  |
| Current health problems:                                                       |                                                                                                                                                                                                          |                                                                                                  |
| Current medications (include OTC medication and medication from other doctors) |                                                                                                                                                                                                          |                                                                                                  |
| <b>Community and Family</b>                                                    |                                                                                                                                                                                                          |                                                                                                  |
| Family Medical History                                                         |                                                                                                                                                                                                          |                                                                                                  |
| Family Issues:                                                                 |                                                                                                                                                                                                          |                                                                                                  |
| Do you care for someone?                                                       | <input type="radio"/> Yes <input type="radio"/> No <input checked="" type="radio"/> Missing                                                                                                              | <input type="radio"/> Adult <input type="radio"/> Child <input checked="" type="radio"/> Missing |
| Number of children:                                                            |                                                                                                                                                                                                          |                                                                                                  |
| Ages of children:                                                              |                                                                                                                                                                                                          |                                                                                                  |
| Are you cared for by someone else?                                             | <input type="radio"/> Yes <input type="radio"/> No <input checked="" type="radio"/> Missing                                                                                                              |                                                                                                  |
| <b>Environmental and Living Conditions</b>                                     |                                                                                                                                                                                                          |                                                                                                  |
| Identified problems:                                                           | Homelessness                                                                                                                                                                                             | <input type="radio"/> Yes <input type="radio"/> No <input checked="" type="radio"/> Missing      |
|                                                                                | Overcrowding                                                                                                                                                                                             | <input type="radio"/> Yes <input type="radio"/> No <input checked="" type="radio"/> Missing      |
|                                                                                | Conflict at home                                                                                                                                                                                         | <input type="radio"/> Yes <input type="radio"/> No <input checked="" type="radio"/> Missing      |
|                                                                                | Other                                                                                                                                                                                                    | <input type="radio"/> Yes <input type="radio"/> No <input checked="" type="radio"/> Missing      |
|                                                                                | Please specify:                                                                                                                                                                                          |                                                                                                  |
| <b>Employment Status:</b>                                                      |                                                                                                                                                                                                          |                                                                                                  |
| Employed full-time                                                             | <input type="radio"/> Yes <input type="radio"/> No <input checked="" type="radio"/> Missing                                                                                                              |                                                                                                  |
| Employed part-time                                                             | <input type="radio"/> Yes <input type="radio"/> No <input checked="" type="radio"/> Missing                                                                                                              |                                                                                                  |
| Voluntary work                                                                 | <input type="radio"/> Yes <input type="radio"/> No <input checked="" type="radio"/> Missing                                                                                                              |                                                                                                  |
| Unemployed                                                                     | <input type="radio"/> Yes <input type="radio"/> No <input checked="" type="radio"/> Missing                                                                                                              |                                                                                                  |
| Study full-time                                                                | <input type="radio"/> Yes <input type="radio"/> No <input checked="" type="radio"/> Missing                                                                                                              |                                                                                                  |

|                    |                                                                                             |
|--------------------|---------------------------------------------------------------------------------------------|
| Study part-time    | <input type="radio"/> Yes <input type="radio"/> No <input checked="" type="radio"/> Missing |
| Carer              | <input type="radio"/> Yes <input type="radio"/> No <input checked="" type="radio"/> Missing |
| Home duties        | <input type="radio"/> Yes <input type="radio"/> No <input checked="" type="radio"/> Missing |
| Disability pension | <input type="radio"/> Yes <input type="radio"/> No <input checked="" type="radio"/> Missing |
| Other pension      | <input type="radio"/> Yes <input type="radio"/> No <input checked="" type="radio"/> Missing |
| Casual             | <input type="radio"/> Yes <input type="radio"/> No <input checked="" type="radio"/> Missing |
| Contract Work      | <input type="radio"/> Yes <input type="radio"/> No <input checked="" type="radio"/> Missing |

### Medical History/Examination by GP

|                                       |                                                                                             |
|---------------------------------------|---------------------------------------------------------------------------------------------|
| New diagnosis from this health check: | <input type="radio"/> Yes <input type="radio"/> No <input checked="" type="radio"/> Missing |
| If Yes, please specify:               | <input type="text"/>                                                                        |

### Accidents and Injuries

|                                                                                                                        |                                                                                             |
|------------------------------------------------------------------------------------------------------------------------|---------------------------------------------------------------------------------------------|
| Have you had any accidents (including motor vehicle) that have required hospital or GP review since last health check? | <input type="radio"/> Yes <input type="radio"/> No <input checked="" type="radio"/> Missing |
| If Yes, please specify:                                                                                                | <input type="text"/>                                                                        |

### Medication Review

|                        |                                                                                                                                                                          |
|------------------------|--------------------------------------------------------------------------------------------------------------------------------------------------------------------------|
| Medication Review:     | <input type="radio"/> Yes <input type="radio"/> No <input checked="" type="radio"/> Missing                                                                              |
| Medication Compliance: | <input type="radio"/> Takes most doses<br><input type="radio"/> Takes some doses<br><input type="radio"/> Does not take meds<br><input checked="" type="radio"/> Missing |
| Identified Problems:   | <input type="text"/>                                                                                                                                                     |

### Cholesterol

|                          |                                             |
|--------------------------|---------------------------------------------|
| Cholesterol / Trig:      | <input type="text"/> / <input type="text"/> |
| HDL / LDL:               | <input type="text"/> / <input type="text"/> |
| Total Cholesterol / HDL: | <input type="text"/> / <input type="text"/> |

### Known Health Problems

|                                                                                                                                                                                                                  |                                                                                                                                                                                          |
|------------------------------------------------------------------------------------------------------------------------------------------------------------------------------------------------------------------|------------------------------------------------------------------------------------------------------------------------------------------------------------------------------------------|
| <input type="checkbox"/> Asthma<br><input type="checkbox"/> Cerebrovascular Disease<br><input type="checkbox"/> Chronic Kidney Disease<br><input type="checkbox"/> COPD<br><input type="checkbox"/> Dyslipidemia | <input type="checkbox"/> Hypertension<br><input type="checkbox"/> Ischemic Heart Disease<br><input type="checkbox"/> Rheumatic Heart Disease<br><input type="checkbox"/> Type 2 Diabetes |
|------------------------------------------------------------------------------------------------------------------------------------------------------------------------------------------------------------------|------------------------------------------------------------------------------------------------------------------------------------------------------------------------------------------|



**PROBLEM LIST**

|  |  |  |
|--|--|--|
|  |  |  |
|--|--|--|

**ACTIONS**

|                  |                                                                                             |                                                                                             |
|------------------|---------------------------------------------------------------------------------------------|---------------------------------------------------------------------------------------------|
| Advice:          | <input type="radio"/> Yes <input type="radio"/> No <input checked="" type="radio"/> Missing |                                                                                             |
| Comments:        |                                                                                             |                                                                                             |
| Pap Smears:      | <input type="radio"/> Yes <input type="radio"/> No <input checked="" type="radio"/> Missing |                                                                                             |
| Comments:        |                                                                                             |                                                                                             |
| New Medications: | <input type="radio"/> Yes <input type="radio"/> No <input checked="" type="radio"/> Missing |                                                                                             |
| Comments:        |                                                                                             |                                                                                             |
| Immunisation:    | <input type="radio"/> Yes <input type="radio"/> No <input checked="" type="radio"/> Missing |                                                                                             |
| Comments:        |                                                                                             |                                                                                             |
| Referrals:       | <input type="radio"/> Yes <input type="radio"/> No <input checked="" type="radio"/> Missing |                                                                                             |
|                  | Referral to Optometrist?                                                                    | <input type="radio"/> Yes <input type="radio"/> No <input checked="" type="radio"/> Missing |
|                  | Referral to Ophthalmologist?                                                                | <input type="radio"/> Yes <input type="radio"/> No <input checked="" type="radio"/> Missing |
|                  | Referral to physiotherapists / exercise group:                                              | <input type="radio"/> Yes <input type="radio"/> No <input checked="" type="radio"/> Missing |
|                  | Referral to Mental Health Service:                                                          | <input type="radio"/> Yes <input type="radio"/> No <input checked="" type="radio"/> Missing |
|                  | Referral to Audiologist/Australian Hearing:                                                 | <input type="radio"/> Yes <input type="radio"/> No <input checked="" type="radio"/> Missing |
|                  | Referral to dietician:                                                                      | <input type="radio"/> Yes <input type="radio"/> No <input checked="" type="radio"/> Missing |
| Comments:        |                                                                                             |                                                                                             |
| Other Action:    | <input type="radio"/> Yes <input type="radio"/> No <input checked="" type="radio"/> Missing |                                                                                             |
| Comments:        |                                                                                             |                                                                                             |

\_\_\_\_\_

**Sign Off**

**Completed?** (Select this only when Health Check is complete)

**User Name**

**Password**

**Save**

Health Check Completed by:

Signed:

Date:
